# Supplementary material for: Organic-free synthesis of {001} facet dominated BiOBr nanosheets for selective photoreduction of CO2 to CO
Source: Royal Society of Chemistry journal article supplement (doi:10.1039/c6cy02040b), 2016-12-01
Supplement: c6cy02040b1.pdf [file c6cy02040b1.pdf]

## Supporting Information

### **Organic-free synthesis of {001} facets dominated BiOBr nanosheets for selective photoreduction of CO<sub>2</sub> to CO**

Dan Wu,<sup>a</sup> Liqun Ye,<sup>a,b,\*</sup> Ho Yin Yip,<sup>a</sup> Po Keung Wong<sup>a\*</sup>

<sup>a</sup> School of Life Sciences, The Chinese University of Hong Kong, Shatin, N.T., Hong Kong SAR, China.

<sup>b</sup> College of Chemistry and Pharmaceutical Engineering, Nanyang Normal University, Nanyang 473061, China.

Corresponding authors:

P.K. Wong: Email: [pkwong@cuhk.edu.hk](mailto:pkwong@cuhk.edu.hk);

L.Q. Ye: Email: [yeliquny@163.com](mailto:yeliquny@163.com).

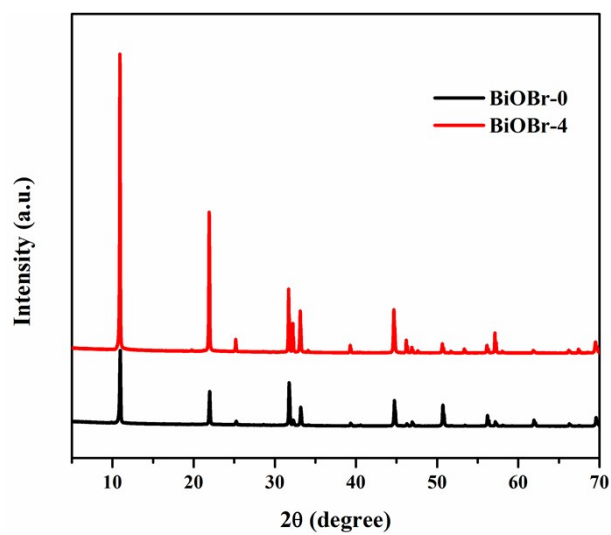

**Fig. S1** XRD patterns of BiOBr-0 and BiOBr-4 nanosheets.

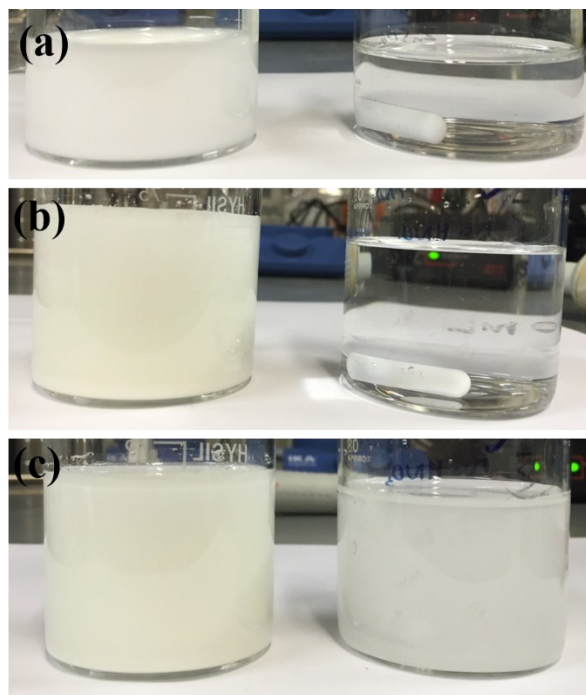

**Fig. S2** Reaction solution after (a)  $\text{Bi}^{3+}$  dissolved in water, (b) adding  $\text{Br}^-$  and (c) further stirring for 30 min for (left) BiOBr-0 and (right) BiOBr-4 precursors before hydrothermal treatment.

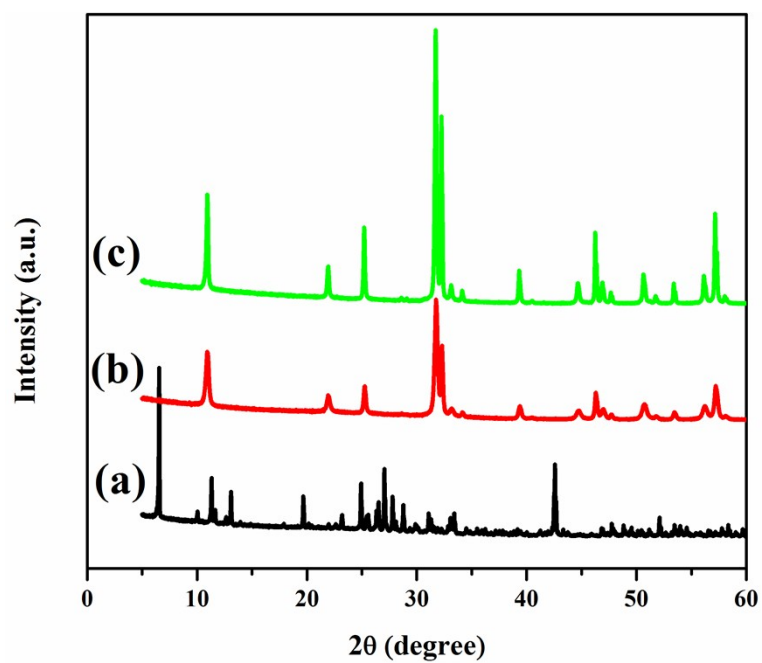

**Fig. S3** XRD patterns of (a) white precipitates after  $\text{Bi}^{3+}$  dissolved in water and yellow precipitates after adding  $\text{Br}^-$  with further 30 min stirring for (b) BiOBr-0 and (c) BiOBr-4 before hydrothermal treatment.

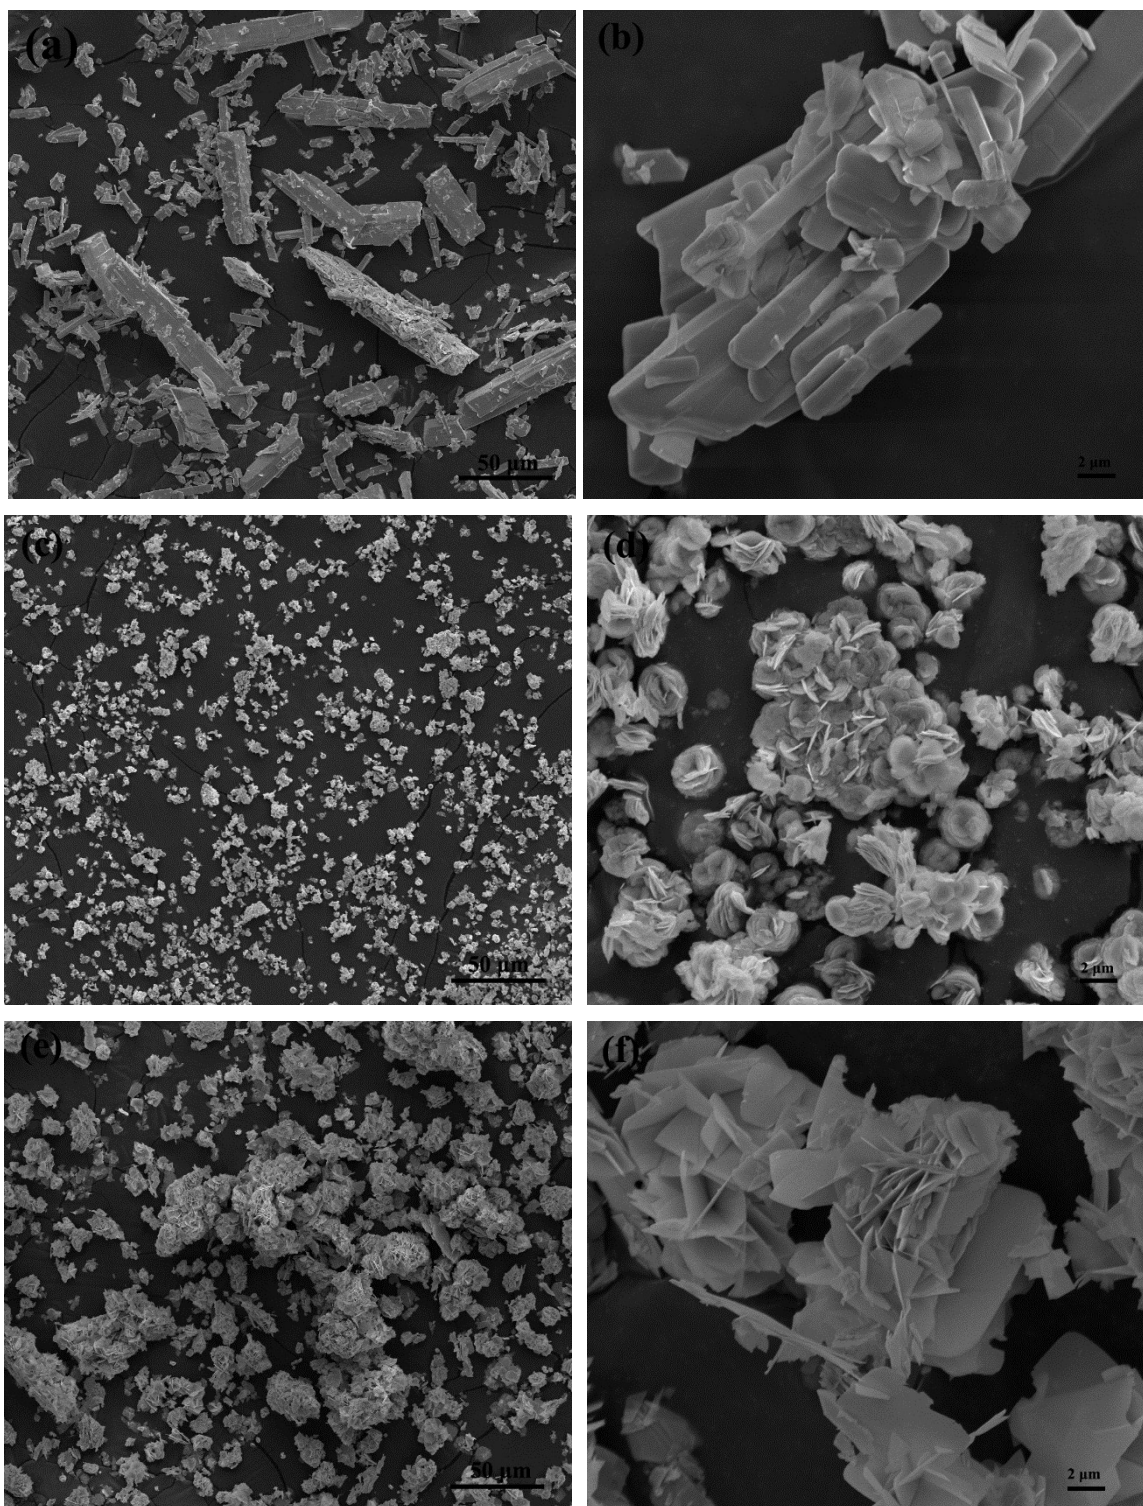

**Fig. S4** SEM images of (a, b) white precipitates after  $\text{Bi}^{3+}$  dissolved in water and yellow precipitates after  $\text{Br}^-$  with further 30 min stirring for (c, d) BiOBr-0 and (e, f) BiOBr-4 before hydrothermal treatment.

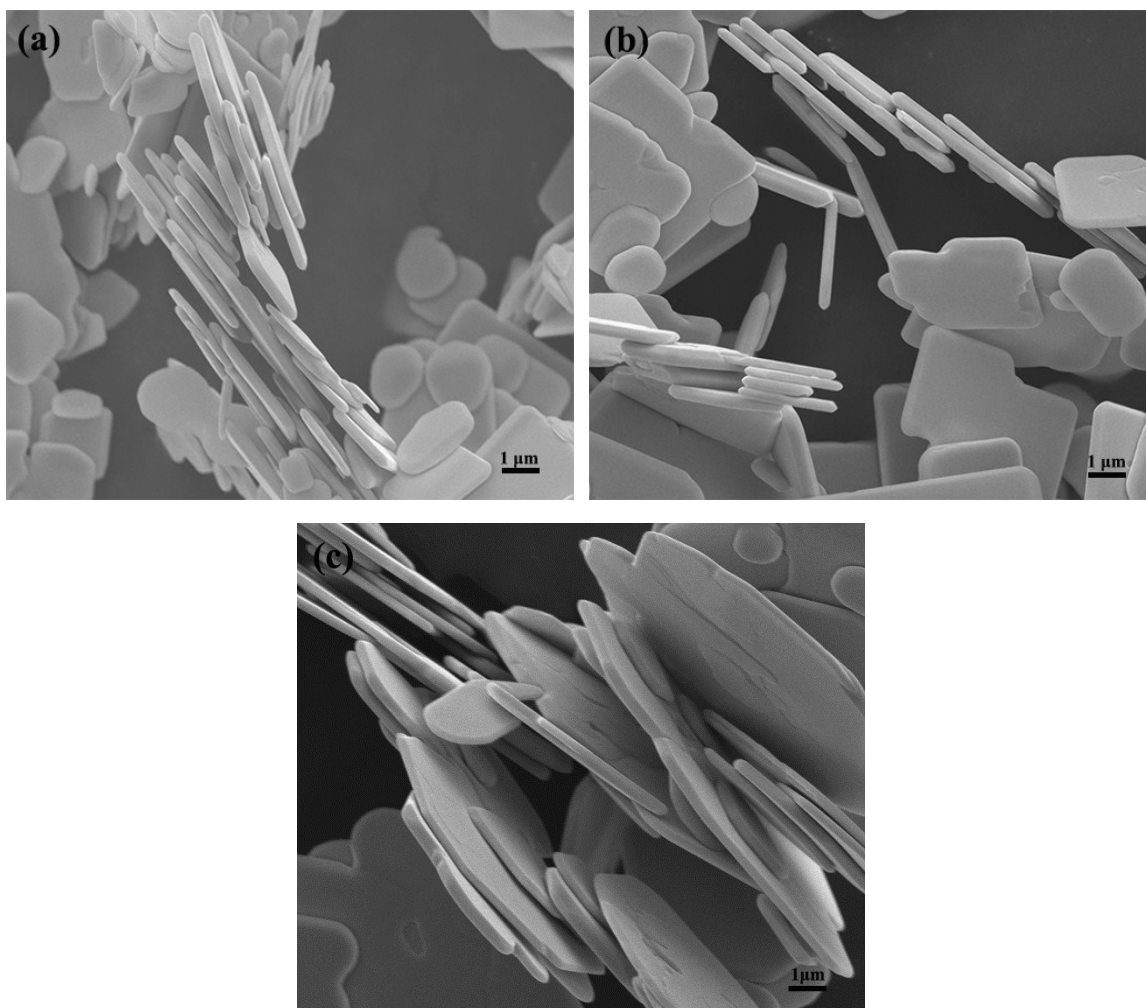

**Fig. S5** SEM images of (a) BiOBr-0.1, (b) BiOBr-0.5, (c) BiOBr-1 samples.

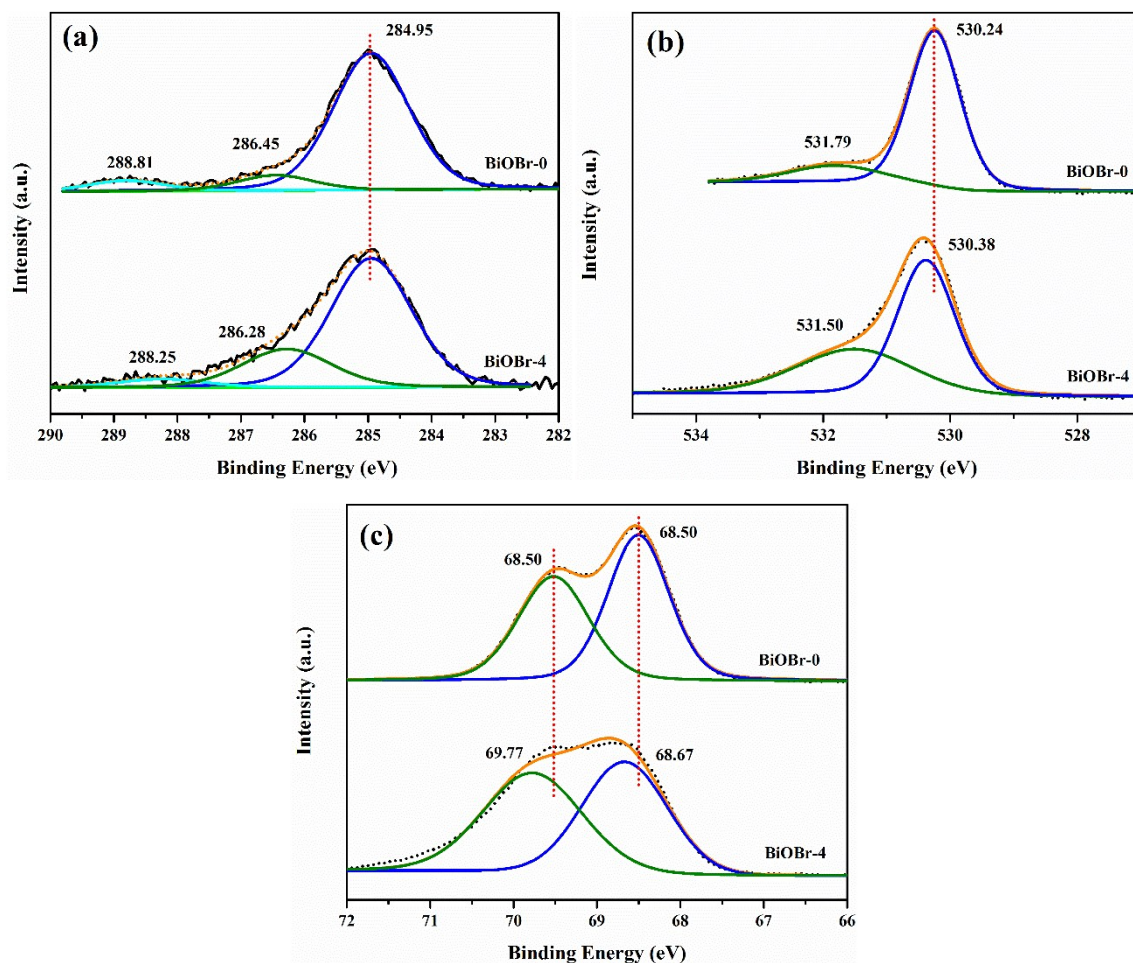

**Fig. S6** XPS spectra of (a) C 1s, (b) O 1s and (c) Br 3d for BiOBr-0 and BiOBr-4 nanosheets.

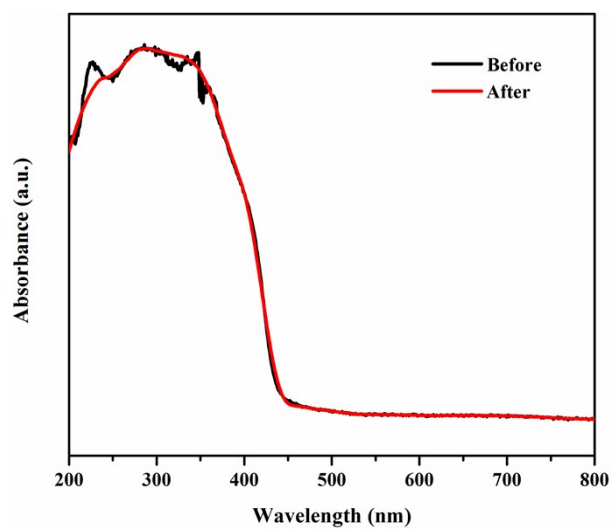

**Fig. S7** UV-vis diffuse reflectance spectra of BiOBr-4 nanosheets before and after reaction.

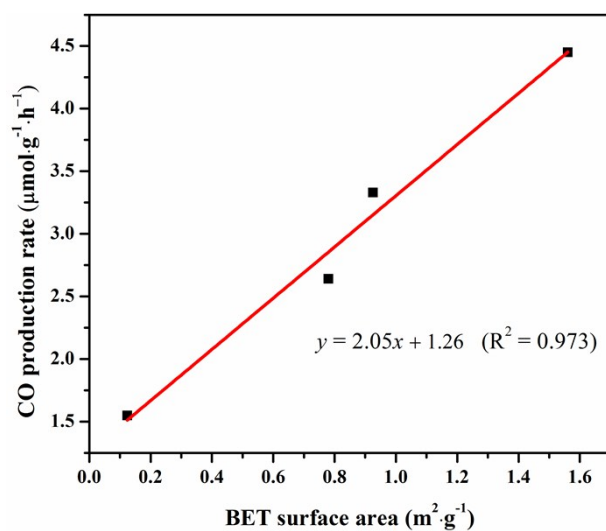

**Fig. S8** Linear fitting curve of BET surface area vs CO production rate of BiOBr-0.1, BiOBr-0.5, BiOBr-1 and BiOBr-4 samples.

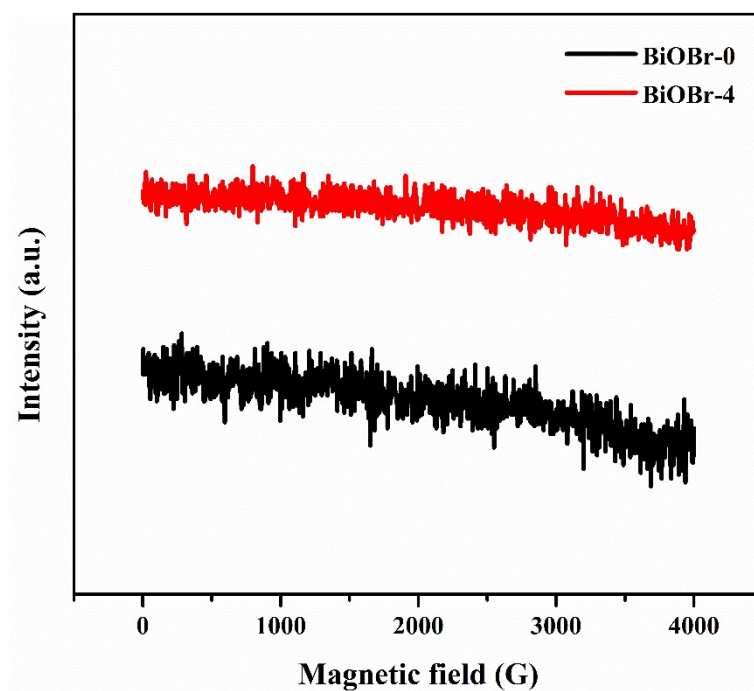

**Fig. S9** Powdered EPR spectra of BiOBr-0 and BiOBr-4 samples (77 K).
